# Supplementary material
Source: PubMed Central journal article supplement (PMC4278427)

**Table S1.** Loadings of the log-contrast transformed epicuticular compounds on the first two canonical variates (CV1, CV2), conducted separately by sex, discriminating among all combinations of populations and species. Females lack any acetates and tri-acylglycerides.

| Log-contrast trait <sup>a</sup>                   | Trait # <sup>b</sup> | ECL <sup>b</sup> | Females |        | Males  |        |
|---------------------------------------------------|----------------------|------------------|---------|--------|--------|--------|
|                                                   |                      |                  | CV1     | CV2    | CV1    | CV2    |
| <i>Acetates</i>                                   |                      |                  |         |        |        |        |
| 11- <i>cis</i> -Vaccenyl acetate (cVa)            | 1                    | 21.90            | NA      | NA     | 0.580  | 2.760  |
| <i>Hydrocarbons</i>                               |                      |                  |         |        |        |        |
| ( <i>Z,Z</i> )-5-9-nonacosadiene and 7-nonacosene | 3                    | 28.78            | -2.285  | 1.083  | -0.200 | -0.864 |
| 5-nonacosene                                      | 4                    | 28.85            | -0.109  | -2.423 | 1.730  | -1.882 |
| 2-methyl triacontane                              | 5                    | 30.66            | 3.594   | 0.775  | -1.394 | -3.040 |
| ( <i>Z,Z</i> )-5-11-hentriacontadiene             | 6                    | 30.74            | -0.794  | 0.778  | 0.338  | 0.238  |
| 5-hentriacontene                                  | 7                    | 30.81            | -1.179  | 0.836  | 1.019  | 1.974  |
| <i>n</i> -methyl dotriacontane                    | 9                    | 32.40            | 1.750   | -0.364 | -1.209 | 0.024  |
| <i>n</i> -trtriacontene                           | 10                   | 32.47            | -0.974  | -0.497 | 0.574  | -1.413 |
| <i>n</i> -trtriacontene                           | 11                   | 32.56            | 1.507   | -2.407 | -0.682 | 0.806  |
| ( <i>Z,Z</i> )-5-13-tritriacontadiene             | 12                   | 32.66            | -3.567  | 6.335  | 3.379  | 4.713  |
| ( <i>Z,Z</i> )-5-11-tritriacontadiene             | 13                   | 32.74            | 4.486   | -2.648 | 0.639  | 1.656  |
| ( <i>Z,Z</i> )- <i>n-n</i> -tritriacontadiene     | 14                   | 32.83            | 0.710   | 0.380  | -2.819 | -1.158 |
| <i>n</i> -methyl tetatriacontane                  | 17                   | 34.40            | -0.247  | 1.975  | -1.050 | 0.937  |
| <i>n</i> -pentatriacontene                        | 18                   | 34.47            | -3.393  | -1.542 | 0.457  | -0.065 |
| ( <i>Z,Z</i> )- <i>n-n</i> -pentatriacontadiene   | 19                   | 34.56            | 0.872   | 0.929  | 2.150  | -0.100 |
| ( <i>Z,Z</i> )-5-13-pentatriacontadiene           | 20                   | 34.66            | 1.786   | 1.974  | -3.775 | 1.823  |
| ( <i>Z,Z</i> )-5-11-pentatriacontadiene           | 21                   | 34.74            | 0.408   | -1.349 | 1.336  | -2.621 |
| <i>Tri-acylglycerides</i>                         |                      |                  |         |        |        |        |
| Tri-acylglyceride #1                              | 15                   | 33.46            | NA      | NA     | 0.638  | -2.719 |
| Tri-acylglyceride #2                              | 16                   | 33.58            | NA      | NA     | -0.472 | -0.765 |
| Tri-acylglyceride #3                              | 22                   | 35.35            | NA      | NA     | -0.918 | -2.111 |
| Tri-acylglyceride #4                              | 23                   | 35.44            | NA      | NA     | 0.065  | -0.234 |
| Tri-acylglyceride #5                              | 24                   | 35.56            | NA      | NA     | 0.190  | 3.248  |

<sup>a</sup>log-contrasts calculated using 2-methyl octacosane (trait #2) as the divisor

<sup>b</sup>Trait # and equivalent chain length (ECL) values for use in compound identification in Fig. S1 and with reference to Curtis et al. (2013)

**Figure S1.** Individual variation in epicuticular compounds of A) female and B) male *D. subquinaria* collected from sympatric (filled symbols) and allopatric (open symbols) locations.

Axes are the first and second canonical variates from a discriminate function analysis, conducted separately by sex, which discriminated among individuals according to population. Circles depict the 95% confidence limits for the various population means. Vectors depict loadings of the log-contrast traits on each canonical variate, with labels as given in Table S1. For clarity, labels have been omitted for a few traits vectors with the lowest loadings.

Axes are the first and second canonical variates from a discriminate function analysis, conducted separately by sex, which discriminated among individuals according to population. Circles depict the 95% confidence limits for the various population means. Vectors depict loadings of the log-contrast traits on each canonical variate, with labels as given in Table S1. For clarity, labels have been omitted for a few traits vectors with the lowest loadings.

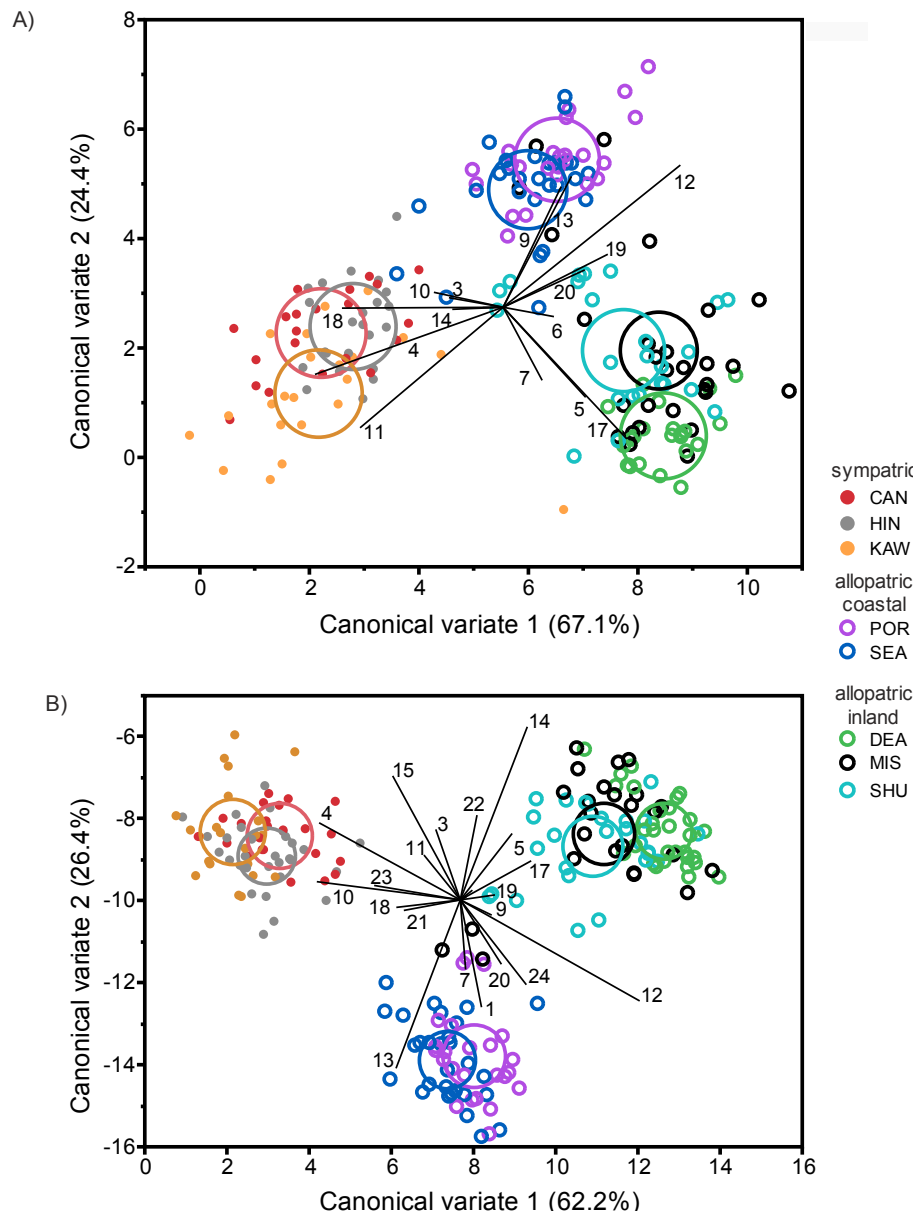

Supplement: NIHMS648765-supplement-Supplemental_info.pdf [file NIHMS648765-supplement-Supplemental_info.pdf]
